# Supplementary material for: Identification and comparative analysis of the CIPK gene family and characterization of the cold stress response in the woody plant Prunus mume
Source: PubMed Central journal article supplement (PMC6499057; doi:10.7717/peerj.6847), 2019-04-30
Supplement: peerj-07-6847-s001.pdf [file peerj-07-6847-s001.pdf]

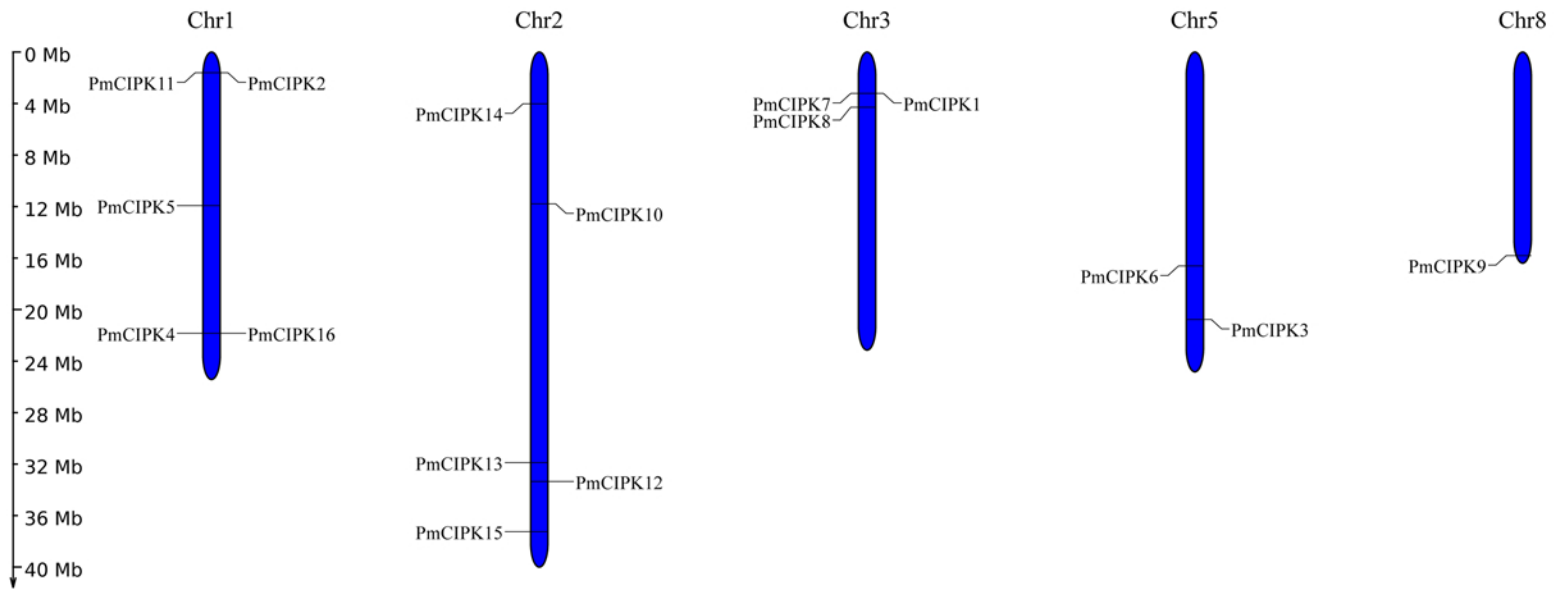

Supplemental Figure S1. Chromosomal locations of *PmCIPK* genes on chromosomes
