# Supplementary material for: Identification and comparative analysis of the CIPK gene family and characterization of the cold stress response in the woody plant Prunus mume
Source: PubMed Central journal article supplement (PMC6499057; doi:10.7717/peerj.6847), 2019-04-30
Supplement: peerj-07-6847-s003.pdf [file peerj-07-6847-s003.pdf]

Motif 1

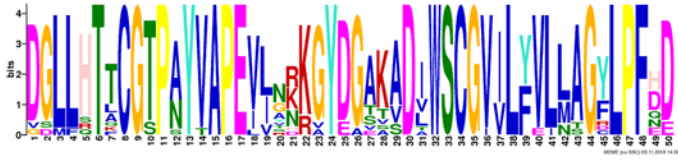

Motif 2

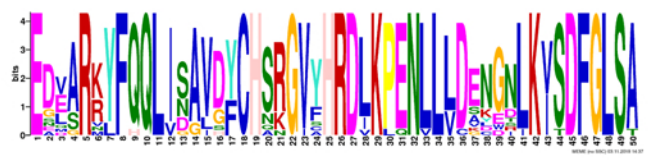

Motif 3

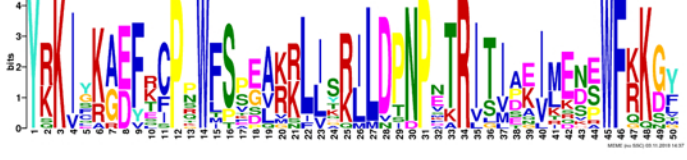

Motif 4

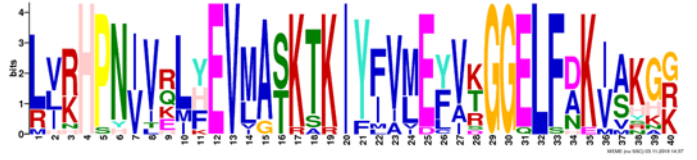

Motif 5

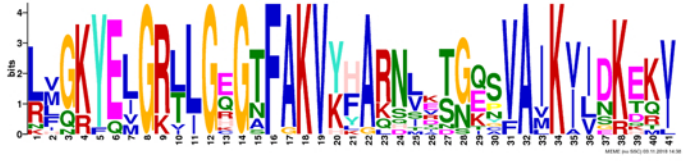

Motif 9

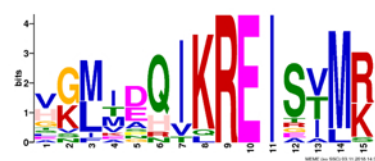

Supplementary Figure S3. Schematic diagram of PmCIPK protein motifs
