# Supplementary material for: Identification and comparative analysis of the CIPK gene family and characterization of the cold stress response in the woody plant Prunus mume
Source: PubMed Central journal article supplement (PMC6499057; doi:10.7717/peerj.6847), 2019-04-30
Supplement: peerj-07-6847-s006.pdf [file peerj-07-6847-s006.pdf]

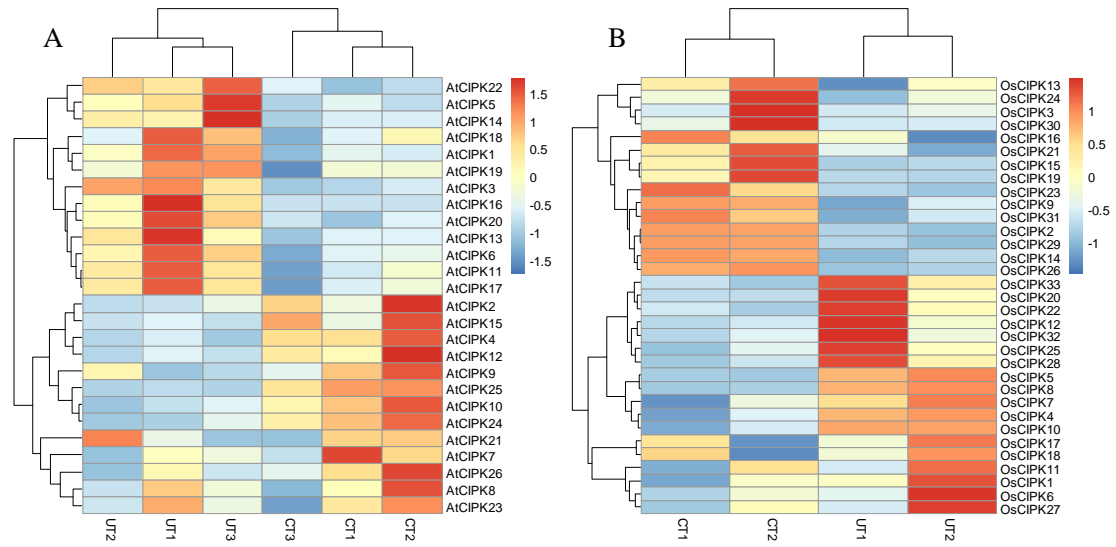

**Supplemental Figure S6. Expression patterns of *CIPK* genes during cold stress. A,** Expression patterns of *CIPK* genes in *A. thaliana*. **B,** Expression profiles of *CIPK* genes in *O. sativa*. CT, Chilling treatment; UT, Unchilling treatment.
