# Supplementary material for: Identification and comparative analysis of the CIPK gene family and characterization of the cold stress response in the woody plant Prunus mume
Source: PeerJ. 2019 Apr 30;7:e6847. doi: 10.7717/peerj.6847 (PMC6499057; doi:10.7717/peerj.6847)
Supplement: Supplemental Information 7 [file peerj-07-6847-s007.xls]

## Sheet: Sheet1
Supplementary tabel S1: PmCIPK genes of forward and reverse primers
Gene_name	Primer_name	Sequences(5'to3')	Purification method
PmCIPK1	PmCIPK1_F	CTGATTTTGGATTGAGCGCAG	PAGE
	PmCIPK1_R	ACCCCACAAGACCAAATATCG	PAGE
PmCIPK2	PmCIPK2_F	AAGTGCCCTCGCTGAAAG	PAGE
	PmCIPK2_R	ATACAAGACCACCCCACAAG	PAGE
PmCIPK3	PmCIPK3_F	GGGTAAATATGAGGTGGGAAGG	PAGE
	PmCIPK3_R	CTGTTCAGCCATCTTGTGTTTG	PAGE
PmCIPK4	PmCIPK4_F	CAAAACAGCCCCAACCATC	PAGE
	PmCIPK4_R	CAGTTTCAATGCCCAACACC	PAGE
PmCIPK5	PmCIPK5_F	GAAAAGGGTTAAGCTCCAAATCC	PAGE
	PmCIPK5_R	TCAAATTGGTAGGTCTGGCC	PAGE
PmCIPK6	PmCIPK6_F	TTATGGCTGTTGAGGTGAAGG	PAGE
	PmCIPK6_R	GAAACGACAAAGTCCTGCAAC	PAGE
PmCIPK7	PmCIPK7_F	CCTGCATATGTAGCACCAGAG	PAGE
	PmCIPK7_R	CAGAAAACCAGCCAACAGAAC	PAGE
PmCIPK8	PmCIPK8_F	GGAATCTCAAAACCTTGTAGTGG	PAGE
	PmCIPK8_R	GCTCAAAGGCATTCATCGTG	PAGE
PmCIPK9	PmCIPK9_F	CTTCTGGGTCACGGTACTTTC	PAGE
	PmCIPK9_R	TTACCTTCTCTTTGCCCACC	PAGE
PmCIPK10	PmCIPK10_F	TCAAGATAAGGCTGCAAGGG	PAGE
	PmCIPK10_R	CCTCACAGAACTTAGCATACTCC	PAGE
PmCIPK11	PmCIPK11_F	TGAGCGTTTCGTGTTGGAG	PAGE
	PmCIPK11_R	AATTACCATTCTGCCCCTCC	PAGE
PmCIPK12	PmCIPK12_F	AGGTGATTGAAGTTGCTCCG	PAGE
	PmCIPK12_R	CCACATCAGACTCTTGCATTTG	PAGE
PmCIPK13	PmCIPK13_F	AAATACGAGCTTGGAAGGACTC	PAGE
	PmCIPK13_R	CTCCCTCTTTATCTGGTCTGTG	PAGE
PmCIPK14	PmCIPK14_F	AGAGTTCTCATGCCCATCTTG	PAGE
	PmCIPK14_R	GAGTTTCAGGGTTCGGATCTAG	PAGE
PmCIPK15	PmCIPK15_F	ACCATCGAGATTTGAAGCCC	PAGE
	PmCIPK15_R	AGTTCCACAGGCAGTATGAAG	PAGE
PmCIPK16	PmCIPK16_F	AAGGTTTCAGACTTCGGGC	PAGE
	PmCIPK16_R	ATATCCACCTTCGCACCTTC	PAGE
