# Supplementary material for: Identification and comparative analysis of the CIPK gene family and characterization of the cold stress response in the woody plant Prunus mume
Source: PeerJ. 2019 Apr 30;7:e6847. doi: 10.7717/peerj.6847 (PMC6499057; doi:10.7717/peerj.6847)
Supplement: Supplemental Information 8 [file peerj-07-6847-s008.xls]

## Sheet: Sheet1
Supplementary table S2. Information for the proteins used in the present study
Org_name	Gene_name	locus	E-value
Prunus mume	PmCIPK1	Pm010243	4e-24
Prunus mume	PmCIPK2	Pm000275	1.1e-23
Prunus mume	PmCIPK3	Pm019034	2.6e-23
Prunus mume	PmCIPK4	Pm003066	2.8e-23
Prunus mume	PmCIPK5	Pm001690	7.8e-23
Prunus mume	PmCIPK6	Pm018300	4e-22
Prunus mume	PmCIPK7	Pm010242	9e-22
Prunus mume	PmCIPK8	Pm010458	1.1e-21
Prunus mume	PmCIPK9	Pm027719	2.5e-21
Prunus mume	PmCIPK10	Pm005699	3.7e-20
Prunus mume	PmCIPK11	Pm000271	4.1e-19
Prunus mume	PmCIPK12	Pm008685	6.3e-19
Prunus mume	PmCIPK13	Pm008498	2.4e-17
Prunus mume	PmCIPK14	Pm004339	4.8e-17
Prunus mume	PmCIPK15	Pm009181	1.7e-12
Prunus mume	PmCIPK16	Pm003063	2.7e-08
Prunus persica	PpCIPK1	Prupe.4G063100.1.p	3.2e-24
Prunus persica	PpCIPK2	Prupe.6G043700.1.p	1.6e-23
Prunus persica	PpCIPK3	Prupe.6G156900.1.p	3.6e-23
Prunus persica	PpCIPK4	Prupe.2G261600.1.p	3.9e-23
Prunus persica	PpCIPK5	Prupe.6G290400.1.p	4.1e-23
Prunus persica	PpCIPK6	Prupe.2G195900.1.p	2.8e-22
Prunus persica	PpCIPK7	Prupe.4G062900.1.p	5.7e-22
Prunus persica	PpCIPK8	Prupe.4G085000.1.p	5.8e-22
Prunus persica	PpCIPK9	Prupe.7G261300.1.p	1.5e-21
Prunus persica	PpCIPK10	Prupe.6G290700.1.p	1.7e-20
Prunus persica	PpCIPK11	Prupe.1G392900.1.p	4.3e-20
Prunus persica	PpCIPK12	Prupe.1G026400.1.p	8.7e-20
Prunus persica	PpCIPK13	Prupe.3G097900.1.p	2.6e-19
Prunus persica	PpCIPK14	Prupe.7G244500.1.p	4.9e-19
Prunus persica	PpCIPK15	Prupe.6G043300.1.p	6.4e-19
Prunus persica	PpCIPK16	Prupe.1G539600.1.p	2.3e-17
Prunus persica	PpCIPK17	Prupe.1G105000.1.p	3.8e-17
Prunus persica	PpCIPK18	Prupe.1G091700.1.p	3.1e-15
Fragaria vesca	FvCIPK1	mrna28136.1-v1.0-hybrid	1e-24
Fragaria vesca	FvCIPK2	mrna13841.1-v1.0-hybrid	4.4e-24
Fragaria vesca	FvCIPK3	mrna29682.1-v1.0-hybrid	4.6e-24
Fragaria vesca	FvCIPK4	mrna15372.1-v1.0-hybrid	1.9e-23
Fragaria vesca	FvCIPK5	mrna18646.1-v1.0-hybrid	3.6e-23
Fragaria vesca	FvCIPK6	mrna30382.1-v1.0-hybrid	2.7e-22
Fragaria vesca	FvCIPK7	mrna10067.1-v1.0-hybrid	2.9e-22
Fragaria vesca	FvCIPK8	mrna29681.1-v1.0-hybrid	3.1e-21
Fragaria vesca	FvCIPK9	mrna13849.1-v1.0-hybrid	2.8e-20
Fragaria vesca	FvCIPK10	mrna31049.1-v1.0-hybrid	3.1e-19
Fragaria vesca	FvCIPK11	mrna15015.1-v1.0-hybrid	8.5e-19
Fragaria vesca	FvCIPK12	mrna22806.1-v1.0-hybrid	2e-18
Fragaria vesca	FvCIPK13	mrna29066.1-v1.0-hybrid	4.2e-18
Fragaria vesca	FvCIPK14	mrna28132.1-v1.0-hybrid	4.5e-18
Fragaria vesca	FvCIPK15	mrna26443.1-v1.0-hybrid	1.3e-17
Fragaria vesca	FvCIPK16	mrna21319.1-v1.0-hybrid	9.3e-17
Fragaria vesca	FvCIPK17	mrna27394.1-v1.0-hybrid	4.1e-09
Fragaria vesca	FvCIPK18	mrna21320.1-v1.0-hybrid	1.3e-08
Malus x domestica	MdCIPK1	MD03G1059600	1.6e-24
Malus x domestica	MdCIPK2	MD10G1278300	3e-24
Malus x domestica	MdCIPK3	MD11G1061700	6.7e-24
Malus x domestica	MdCIPK4	MD04G1171600	7.2e-24
Malus x domestica	MdCIPK5	MD12G1185000	9.3e-24
Malus x domestica	MdCIPK6	MD03G1163600	6.5e-23
Malus x domestica	MdCIPK7	MD05G1298800	1.6e-22
Malus x domestica	MdCIPK8	MD07G1157500	2.8e-22
Malus x domestica	MdCIPK9	MD01G1087300	3.5e-22
Malus x domestica	MdCIPK10	MD15G1153500	3.7e-22
Malus x domestica	MdCIPK11	MD10G1278400	4.1e-22
Malus x domestica	MdCIPK12	MD10G1258700	6.1e-22
Malus x domestica	MdCIPK13	MD01G1163600	1.7e-21
Malus x domestica	MdCIPK14	MD04G1172200	2.1e-21
Malus x domestica	MdCIPK15	MD05G1298900	3.1e-21
Malus x domestica	MdCIPK16	MD12G1185400	1.2e-20
Malus x domestica	MdCIPK17	MD03G1054700	3.9e-20
Malus x domestica	MdCIPK18	MD15G1039300	6.9e-20
Malus x domestica	MdCIPK19	MD02G1030100	2.5e-19
Malus x domestica	MdCIPK20	MD16G1204900	4.4e-19
Malus x domestica	MdCIPK21	MD15G1171600	6.5e-19
Malus x domestica	MdCIPK22	MD13G1139700	7.2e-19
Malus x domestica	MdCIPK23	MD11G1056100	1.1e-18
Malus x domestica	MdCIPK24	MD13G1203400	1.4e-18
Malus x domestica	MdCIPK25	MD16G1136100	2.9e-18
Malus x domestica	MdCIPK26	MD17G1222800	5.5e-18
Malus x domestica	MdCIPK27	MD15G1390800	2.1e-17
Malus x domestica	MdCIPK28	MD08G1206900	4.8e-17
Malus x domestica	MdCIPK29	MD13G1265500	4.7e-16
Malus x domestica	MdCIPK30	MD05G1280400	1.1e-08
Rosa multiflora	RmCIPK1	Rmu_sc0008676.1_g000003.1	3.5e-25
Rosa multiflora	RmCIPK2	Rmu_co8374009.1_g000001.1	3.5e-24
Rosa multiflora	RmCIPK3	Rmu_sc0021377.1_g000007.1	9e-24
Rosa multiflora	RmCIPK4	Rmu_sc0003242.1_g000008.1	1.1e-23
Rosa multiflora	RmCIPK5	Rmu_sc0000333.1_g000007.1	5.7e-23
Rosa multiflora	RmCIPK6	Rmu_sc0000677.1_g000045.1	1e-22
Rosa multiflora	RmCIPK7	Rmu_sc0001748.1_g000016.1	1.5e-22
Rosa multiflora	RmCIPK8	Rmu_co8519507.1_g000001.1	5e-22
Rosa multiflora	RmCIPK9	Rmu_sc0013610.1_g000010.1	9.8e-22
Rosa multiflora	RmCIPK10	Rmu_sc0003242.1_g000007.1	1.3e-21
Rosa multiflora	RmCIPK11	Rmu_co8374649.1_g000001.1	1.2e-20
Rosa multiflora	RmCIPK12	Rmu_sc0008258.1_g000006.1	6e-20
Rosa multiflora	RmCIPK13	Rmu_sc0004235.1_g000049.1	2.4e-19
Rosa multiflora	RmCIPK14	Rmu_sc0007873.1_g000002.1	4.1e-19
Rosa multiflora	RmCIPK15	Rmu_sc0009627.1_g000006.1	1.8e-18
Rosa multiflora	RmCIPK16	Rmu_sc0008806.1_g000004.1	3.3e-18
Rosa multiflora	RmCIPK17	Rmu_sc0001395.1_g000009.1	3.3e-18
Rosa multiflora	RmCIPK18	Rmu_sc0012612.1_g000003.1	3.3e-18
Rosa multiflora	RmCIPK19	Rmu_sc0008770.1_g000015.1	2.8e-17
Rosa multiflora	RmCIPK20	Rmu_sc0006821.1_g000008.1	5.6e-17
Rosa multiflora	RmCIPK21	Rmu_sc0007038.1_g000017.1	2.1e-15
Rosa multiflora	RmCIPK22	Rmu_sc0001755.1_g000051.1	4.9e-15
Rosa chinensis	RcCIPK1	RcHm_v2.0_Chr5g0072431	1e-24
Rosa chinensis	RcCIPK2	RcHm_v2.0_Chr3g0460951	6.1e-24
Rosa chinensis	RcCIPK3	RcHm_v2.0_Chr5g0011071	7.2e-24
Rosa chinensis	RcCIPK4	RcHm_v2.0_Chr5g0050061	3.8e-23
Rosa chinensis	RcCIPK5	RcHm_v2.0_Chr2g0085831	6.8e-23
Rosa chinensis	RcCIPK6	RcHm_v2.0_Chr1g0360871	6.9e-23
Rosa chinensis	RcCIPK7	RcHm_v2.0_Chr5g0014761	4.2e-22
Rosa chinensis	RcCIPK8	RcHm_v2.0_Chr5g0011061	8.7e-22
Rosa chinensis	RcCIPK9	RcHm_v2.0_Chr3g0460881	4e-20
Rosa chinensis	RcCIPK10	RcHm_v2.0_Chr6g0299521	1.9e-19
Rosa chinensis	RcCIPK11	RcHm_v2.0_Chr5g0072521	3.8e-19
Rosa chinensis	RcCIPK12	RcHm_v2.0_Chr4g0427571	1.2e-18
Rosa chinensis	RcCIPK13	RcHm_v2.0_Chr2g0088231	1.3e-18
Rosa chinensis	RcCIPK14	RcHm_v2.0_Chr7g0233351	2.7e-18
Rosa chinensis	RcCIPK15	RcHm_v2.0_Chr4g0388971	3.5e-18
Rosa chinensis	RcCIPK16	RcHm_v2.0_Chr2g0133031	1.9e-17
Rosa chinensis	RcCIPK17	RcHm_v2.0_Chr1g0371771	1.6e-15
Rosa chinensis	RcCIPK18	RcHm_v2.0_Chr4g0403561	2e-15
Pyrus communis	PcCIPK1	PCP027628.1	4.7e-25
Pyrus communis	PcCIPK2	PCP007181.1	2.9e-24
Pyrus communis	PcCIPK3	PCP015952.1	7.6e-24
Pyrus communis	PcCIPK4	PCP022143.1	1.4e-23
Pyrus communis	PcCIPK5	PCP004503.1	1.8e-23
Pyrus communis	PcCIPK6	PCP006628.1	3.3e-23
Pyrus communis	PcCIPK7	PCP010491.1	2.6e-22
Pyrus communis	PcCIPK8	PCP018091.1	3.4e-22
Pyrus communis	PcCIPK9	PCP019312.1	3.5e-22
Pyrus communis	PcCIPK10	PCP007182.1	4.7e-22
Pyrus communis	PcCIPK11	PCP022964.1	5.1e-22
Pyrus communis	PcCIPK12	PCP019988.1	6.3e-22
Pyrus communis	PcCIPK13	PCP019428.1	1e-21
Pyrus communis	PcCIPK14	PCP014483.1	1.3e-21
Pyrus communis	PcCIPK15	PCP010041.1	1.7e-21
Pyrus communis	PcCIPK16	PCP006627.1	2.5e-20
Pyrus communis	PcCIPK17	PCP001499.1	2.6e-20
Pyrus communis	PcCIPK18	PCP009349.1	5.1e-20
Pyrus communis	PcCIPK19	PCP017339.1	8e-20
Pyrus communis	PcCIPK20	PCP003663.1	1.6e-19
Pyrus communis	PcCIPK21	PCP002041.1	2e-19
Pyrus communis	PcCIPK22	PCP025210.1	2.8e-19
Pyrus communis	PcCIPK23	PCP039672.1	2.9e-19
Pyrus communis	PcCIPK24	PCP023788.1	8.1e-19
Pyrus communis	PcCIPK25	PCP025337.1	1.4e-18
Pyrus communis	PcCIPK26	PCP023565.1	2.2e-18
Pyrus communis	PcCIPK27	PCP011333.1	2.7e-18
Pyrus communis	PcCIPK28	PCP006895.1	2.1e-17
Pyrus communis	PcCIPK29	PCP029597.1	2.1e-17
Pyrus communis	PcCIPK30	PCP043712.1	2.4e-17
Pyrus communis	PcCIPK31	PCP036990.1	1.5e-08
Rubus occidentalis	RoCIPK1	Ro06_G05691	3e-24
Rubus occidentalis	RoCIPK2	Ro03_G05264	4.4e-24
Rubus occidentalis	RoCIPK3	Ro03_G10629	4.9e-24
Rubus occidentalis	RoCIPK4	Ro03_G27603	8.5e-24
Rubus occidentalis	RoCIPK5	Ro07_G07887	2.9e-23
Rubus occidentalis	RoCIPK6	Ro01_G05070	4.1e-23
Rubus occidentalis	RoCIPK7	Ro03_G05263	1.9e-21
Rubus occidentalis	RoCIPK8	Ro03_G15310	2.7e-21
Rubus occidentalis	RoCIPK9	Ro02_G02475	1.4e-19
Rubus occidentalis	RoCIPK10	Ro01_G10353	2.4e-19
Rubus occidentalis	RoCIPK11	Ro03_G10625	5.9e-19
Rubus occidentalis	RoCIPK12	Ro04_G21539	8.2e-19
Rubus occidentalis	RoCIPK13	Ro06_G05694	1.2e-18
Rubus occidentalis	RoCIPK14	Ro04_G13567	4.2e-18
Rubus occidentalis	RoCIPK15	Ro05_G25912	1.8e-17
Rubus occidentalis	RoCIPK16	Ro06_G16672	9.3e-17
Prunus avium	PaCIPK1	Pav_sc0000037.1_g580.1.mk	3e-24
Prunus avium	PaCIPK2	Pav_sc0000499.1_g180.1.mk	2.6e-23
Prunus avium	PaCIPK3	Pav_sc0001502.1_g480.1.mk	3.5e-23
Prunus avium	PaCIPK4	Pav_sc0001205.1_g400.1.mk	3.5e-23
Prunus avium	PaCIPK5	Pav_sc0004242.1_g010.1.mk	4.9e-23
Prunus avium	PaCIPK6	Pav_sc0000375.1_g240.1.mk	8.5e-23
Prunus avium	PaCIPK7	Pav_sc0000557.1_g1120.1.mk	1.6e-22
Prunus avium	PaCIPK8	Pav_sc0000586.1_g940.1.mk	1.9e-22
Prunus avium	PaCIPK9	Pav_sc0000037.1_g560.1.mk	1.1e-21
Prunus avium	PaCIPK10	Pav_sc0001502.1_g510.1.mk	5.7e-21
Prunus avium	PaCIPK11	Pav_sc0000890.1_g510.1.mk	2.9e-20
Prunus avium	PaCIPK12	Pav_sc0000998.1_g090.1.mk	7.3e-20
Prunus avium	PaCIPK13	Pav_sc0000704.1_g960.1.mk	3.5e-19
Prunus avium	PaCIPK14	Pav_sc0000375.1_g180.1.mk	6.6e-19
Prunus avium	PaCIPK15	Pav_sc0000981.1_g200.1.mk	2.3e-18
Prunus avium	PaCIPK16	Pav_sc0002327.1_g410.1.mk	2.1e-17
Prunus avium	PaCIPK17	Pav_sc0000308.1_g280.1.mk	1.6e-15
Prunus avium	PaCIPK18	Pav_sc0003135.1_g190.1.mk	1.2e-08
Prunus avium	PaCIPK19	Pav_sc0000065.1_g200.1.mk	1.2e-08
Prunus avium	PaCIPK20	Pav_co4020041.1_g010.1.mk	5.8e-08
Prunus yedoensis var. nudiflora	PyCIPK1	PQQ19164.1	3.3e-23
Prunus yedoensis var. nudiflora	PyCIPK2	PQQ00391.1	3.3e-23
Prunus yedoensis var. nudiflora	PyCIPK3	PQQ21734.1	2.3e-22
Prunus yedoensis var. nudiflora	PyCIPK4	PQP99924.1	2.5e-22
Prunus yedoensis var. nudiflora	PyCIPK5	PQM42874.1	4.7e-22
Prunus yedoensis var. nudiflora	PyCIPK6	PQP93655.1	5e-22
Prunus yedoensis var. nudiflora	PyCIPK7	PQP98847.1	1e-21
Prunus yedoensis var. nudiflora	PyCIPK8	PQM35649.1	1.7e-21
Prunus yedoensis var. nudiflora	PyCIPK9	PQQ00394.1	5.4e-21
Prunus yedoensis var. nudiflora	PyCIPK10	PQM41349.1	1.7e-20
Prunus yedoensis var. nudiflora	PyCIPK11	PQQ21034.1	2.8e-20
Prunus yedoensis var. nudiflora	PyCIPK12	PQQ19170.1	3.3e-19
Prunus yedoensis var. nudiflora	PyCIPK13	PQM40245.1	3.3e-19
Prunus yedoensis var. nudiflora	PyCIPK14	PQQ14158.1	3.6e-19
Prunus yedoensis var. nudiflora	PyCIPK15	PQQ00250.1	1.5e-17
Prunus yedoensis var. nudiflora	PyCIPK16	PQM34947.1	2.2e-17
Prunus yedoensis var. nudiflora	PyCIPK17	PQQ11266.1	2.2e-13
Prunus yedoensis var. nudiflora	PyCIPK18	PQM42059.1	6e-06
