# Supplementary material for: Identification and comparative analysis of the CIPK gene family and characterization of the cold stress response in the woody plant Prunus mume
Source: PeerJ. 2019 Apr 30;7:e6847. doi: 10.7717/peerj.6847 (PMC6499057; doi:10.7717/peerj.6847)
Supplement: Supplemental Information 10 [file peerj-07-6847-s010.xls]

## Sheet: Sheet1
Supplementary table S4. The information of homologous relationship of PmCIPKs
Name	Model template	PDB header	Confidence	Coverage	Identity	PDB Molecule	PDB Title
PmCIPK1	c5ebzF	transferase/transferase inhibitor	1	0.52	0.3	inhibitor of nuclear factor kappa-b kinase subunit alpha	crystal structure of human ikk1
	c4wnkA	ligase	1	0.53	0.29	g protein-coupled receptor kinase 5	crystal structure of bovine g protein coupled-receptor kinase 5 in2 complex with ccg215022
	c3pfqA	transferase	1	0.53	0.32	protein kinase c beta type	crystal structure and allosteric activation of protein kinase c beta2 ii
	c6c9dB	transferase	1	0.54	0.43	serine/threonine-protein kinase mark1,serine/threonine-	crystal structure of ka1-autoinhibited mark1 kinase
	c4cfhA	transferase	1	0.55	0.42	5'-amp-activated protein kinase catalytic subunit alpha-1	structure of an active form of mammalian ampk
PmCIPK2	c6c9dB	transferase	1	0.91	0.28	serine/threonine-protein kinase mark1,serine/threonine-	crystal structure of ka1-autoinhibited mark1 kinase
	c5ebzF	transferase/transferase inhibitor	1	0.55	0.25	inhibitor of nuclear factor kappa-b kinase subunit alpha	crystal structure of human ikk1
	c4wnkA	ligase	1	0.56	0.29	g protein-coupled receptor kinase 5	crystal structure of bovine g protein coupled-receptor kinase 5 in2 complex with ccg215022
	c3pfqA	transferase	1	0.55	0.31	protein kinase c beta type	crystal structure and allosteric activation of protein kinase c beta2 ii
	c4cfhA	transferase	1	0.87	0.3	5'-amp-activated protein kinase catalytic subunit alpha-1	structure of an active form of mammalian ampk
PmCIPK3	c6c9dB	transferase	1	0.94	0.32	serine/threonine-protein kinase mark1,serine/threonine-	crystal structure of ka1-autoinhibited mark1 kinase
	c5ebzF	transferase/transferase inhibitor	1	0.58	0.27	inhibitor of nuclear factor kappa-b kinase subunit alpha	crystal structure of human ikk1
	c4wnkA	ligase	1	0.58	0.27	g protein-coupled receptor kinase 5	crystal structure of bovine g protein coupled-receptor kinase 5 in2 complex with ccg215022
	c4cfhA	transferase	1	0.92	0.31	5'-amp-activated protein kinase catalytic subunit alpha-1	structure of an active form of mammalian ampk
	c3pfqA	transferase	1	0.58	0.33	protein kinase c beta type	crystal structure and allosteric activation of protein kinase c beta2 ii
PmCIPK4	c5ebzF	transferase/transferase inhibitor	1	0.5	0.29	inhibitor of nuclear factor kappa-b kinase subunit alpha	crystal structure of human ikk1
	c4wnkA	ligase	1	0.55	0.25	g protein-coupled receptor kinase 5	crystal structure of bovine g protein coupled-receptor kinase 5 in2 complex with ccg215022
	c3pfqA	transferase	1	0.55	0.28	protein kinase c beta type	crystal structure and allosteric activation of protein kinase c beta2 ii
	c6c9dB	transferase	1	0.81	0.3	serine/threonine-protein kinase mark1,serine/threonine-	crystal structure of ka1-autoinhibited mark1 kinase
	c4cfhA	transferase	1	0.8	0.3	5'-amp-activated protein kinase catalytic subunit alpha-1	structure of an active form of mammalian ampk
PmCIPK5	c6c9dB	transferase	1	0.95	0.31	serine/threonine-protein kinase mark1,serine/threonine-	crystal structure of ka1-autoinhibited mark1 kinase
	c4cfhA	transferase	1	0.91	0.35	5'-amp-activated protein kinase catalytic subunit alpha-1	structure of an active form of mammalian ampk
	c5ebzF	transferase/transferase inhibitor	1	0.58	0.27	inhibitor of nuclear factor kappa-b kinase subunit alpha	crystal structure of human ikk1
	c4wnkA	ligase	1	0.58	0.28	g protein-coupled receptor kinase 5	crystal structure of bovine g protein coupled-receptor kinase 5 in2 complex with ccg215022
	c3pfqA	transferase	1	0.59	0.29	protein kinase c beta type	crystal structure and allosteric activation of protein kinase c beta2 ii
PmCIPK6	c6c9dB	transferase	1	0.92	0.3	serine/threonine-protein kinase mark1,serine/threonine-	crystal structure of ka1-autoinhibited mark1 kinase
	c4cfhA	transferase	1	0.89	0.36	5'-amp-activated protein kinase catalytic subunit alpha-1	structure of an active form of mammalian ampk
	c5ebzF	transferase/transferase inhibitor	1	0.59	0.31	inhibitor of nuclear factor kappa-b kinase subunit alpha	crystal structure of human ikk1
	c4wnkA	ligase	1	0.58	0.27	g protein-coupled receptor kinase 5	crystal structure of bovine g protein coupled-receptor kinase 5 in2 complex with ccg215022
	c3pfqA	transferase	1	0.58	0.31	protein kinase c beta type	crystal structure and allosteric activation of protein kinase c beta2 ii
PmCIPK7	c6c9dB	transferase	1	0.92	0.29	serine/threonine-protein kinase mark1,serine/threonine-	crystal structure of ka1-autoinhibited mark1 kinase
	c5ebzF	transferase/transferase inhibitor	1	0.55	0.28	inhibitor of nuclear factor kappa-b kinase subunit alpha	crystal structure of human ikk1
	c4wnkA	ligase	1	0.56	0.24	g protein-coupled receptor kinase 5	crystal structure of bovine g protein coupled-receptor kinase 5 in2 complex with ccg215022
	c3pfqA	transferase	1	0.55	0.3	protein kinase c beta type	crystal structure and allosteric activation of protein kinase c beta2 ii
	c4cfhA	transferase	1	0.89	0.3	5'-amp-activated protein kinase catalytic subunit alpha-1	structure of an active form of mammalian ampk
PmCIPK8	c6c9dB	transferase	1	0.91	0.3	serine/threonine-protein kinase mark1,serine/threonine-	crystal structure of ka1-autoinhibited mark1 kinase
	c4cfhA	transferase	1	0.88	0.34	5'-amp-activated protein kinase catalytic subunit alpha-1	structure of an active form of mammalian ampk
	c5ebzF	transferase/transferase inhibitor	1	0.56	0.3	inhibitor of nuclear factor kappa-b kinase subunit alpha	crystal structure of human ikk1
	c3pfqA	transferase	1	0.67	0.28	protein kinase c beta type	crystal structure and allosteric activation of protein kinase c beta2 ii
	c4wnkA	ligase	1	0.57	0.28	g protein-coupled receptor kinase 5	crystal structure of bovine g protein coupled-receptor kinase 5 in2 complex with ccg215022
PmCIPK9	c5ebzF	transferase/transferase inhibitor	1	0.59	0.27	inhibitor of nuclear factor kappa-b kinase subunit alpha	crystal structure of human ikk1
	c6c9dB	transferase	1	0.93	0.29	serine/threonine-protein kinase mark1,serine/threonine-	crystal structure of ka1-autoinhibited mark1 kinase
	c4wnkA	ligase	1	0.61	0.26	g protein-coupled receptor kinase 5	crystal structure of bovine g protein coupled-receptor kinase 5 in2 complex with ccg215022
	c4cfhA	transferase	1	0.89	0.3	5'-amp-activated protein kinase catalytic subunit alpha-1	structure of an active form of mammalian ampk
	c3pfqA	transferase	1	0.59	0.31	protein kinase c beta type	crystal structure and allosteric activation of protein kinase c beta2 ii
PmCIPK10	c6c9dB	transferase	1	0.92	0.3	serine/threonine-protein kinase mark1,serine/threonine-	crystal structure of ka1-autoinhibited mark1 kinase
	c4cfhA	transferase	1	0.89	0.3	5'-amp-activated protein kinase catalytic subunit alpha-1	structure of an active form of mammalian ampk
	c5ebzF	transferase/transferase inhibitor	1	0.57	0.28	inhibitor of nuclear factor kappa-b kinase subunit alpha	crystal structure of human ikk1
	c4wnkA	ligase	1	0.59	0.29	g protein-coupled receptor kinase 5	crystal structure of bovine g protein coupled-receptor kinase 5 in2 complex with ccg215022
	c3pfqA	transferase	1	0.57	0.32	protein kinase c beta type	crystal structure and allosteric activation of protein kinase c beta2 ii
PmCIPK11	c5ebzF	transferase/transferase inhibitor	1	0.56	0.29	inhibitor of nuclear factor kappa-b kinase subunit alpha	crystal structure of human ikk1
	c4wnkA	ligase	1	0.57	0.26	g protein-coupled receptor kinase 5	crystal structure of bovine g protein coupled-receptor kinase 5 in2 complex with ccg215022
	c3pfqA	transferase	1	0.58	0.29	protein kinase c beta type	crystal structure and allosteric activation of protein kinase c beta2 ii
	c6c9dB	transferase	1	0.57	0.45	serine/threonine-protein kinase mark1,serine/threonine-	crystal structure of ka1-autoinhibited mark1 kinase
	c4cfhA	transferase	1	0.57	0.41	5'-amp-activated protein kinase catalytic subunit alpha-1	structure of an active form of mammalian ampk
PmCIPK12	c6c9dB	transferase	1	0.59	0.42	serine/threonine-protein kinase mark1,serine/threonine-	crystal structure of ka1-autoinhibited mark1 kinase
	c5ebzF	transferase/transferase inhibitor	1	0.54	0.29	inhibitor of nuclear factor kappa-b kinase subunit alpha	crystal structure of human ikk1
	c4wnkA	ligase	1	0.54	0.25	g protein-coupled receptor kinase 5	crystal structure of bovine g protein coupled-receptor kinase 5 in2 complex with ccg215022
	c3pfqA	transferase	1	0.55	0.28	protein kinase c beta type	crystal structure and allosteric activation of protein kinase c beta2 ii
	c4cfhA	transferase	1	0.58	0.44	5'-amp-activated protein kinase catalytic subunit alpha-1	structure of an active form of mammalian ampk
PmCIPK13	c6c9dB	transferase	1	0.91	0.32	serine/threonine-protein kinase mark1,serine/threonine-	crystal structure of ka1-autoinhibited mark1 kinase
	c5ebzF	transferase/transferase inhibitor	1	0.56	0.27	inhibitor of nuclear factor kappa-b kinase subunit alpha	crystal structure of human ikk1
	c4cfhA	transferase	1	0.88	0.34	5'-amp-activated protein kinase catalytic subunit alpha-1	structure of an active form of mammalian ampk
	c4wnkA	ligase	1	0.56	0.3	g protein-coupled receptor kinase 5	crystal structure of bovine g protein coupled-receptor kinase 5 in2 complex with ccg215022
	c3pfqA	transferase	1	0.57	0.34	protein kinase c beta type	crystal structure and allosteric activation of protein kinase c beta2 ii
PmCIPK14	c6c9dB	transferase	1	0.93	0.3	serine/threonine-protein kinase mark1,serine/threonine-	crystal structure of ka1-autoinhibited mark1 kinase
	c5ebzF	transferase/transferase inhibitor	1	0.57	0.3	inhibitor of nuclear factor kappa-b kinase subunit alpha	crystal structure of human ikk1
	c4cfhA	transferase	1	0.9	0.34	5'-amp-activated protein kinase catalytic subunit alpha-1	structure of an active form of mammalian ampk
	c3pfqA	transferase	1	0.57	0.3	protein kinase c beta type	crystal structure and allosteric activation of protein kinase c beta2 ii
	c4wnkA	ligase	1	0.57	0.3	g protein-coupled receptor kinase 5	crystal structure of bovine g protein coupled-receptor kinase 5 in2 complex with ccg215022
PmCIPK15	c6c9dB	transferase	1	0.65	0.39	serine/threonine-protein kinase mark1,serine/threonine-	crystal structure of ka1-autoinhibited mark1 kinase
	c4cfhA	transferase	1	0.72	0.34	5'-amp-activated protein kinase catalytic subunit alpha-1	structure of an active form of mammalian ampk
	c5ebzF	transferase/transferase inhibitor	1	0.61	0.26	inhibitor of nuclear factor kappa-b kinase subunit alpha	crystal structure of human ikk1
	c4wnkA	ligase	1	0.62	0.24	g protein-coupled receptor kinase 5	crystal structure of bovine g protein coupled-receptor kinase 5 in2 complex with ccg215022
	c3pfqA	transferase	1	0.61	0.27	protein kinase c beta type	crystal structure and allosteric activation of protein kinase c beta2 ii
PmCIPK16	c6c9dB	transferase	1	0.92	0.29	serine/threonine-protein kinase mark1,serine/threonine-	crystal structure of ka1-autoinhibited mark1 kinase
	c5ebzF	transferase/transferase inhibitor	1	0.62	0.28	inhibitor of nuclear factor kappa-b kinase subunit alpha	crystal structure of human ikk1
	c4wnkA	ligase	1	0.61	0.24	g protein-coupled receptor kinase 5	crystal structure of bovine g protein coupled-receptor kinase 5 in2 complex with ccg215022
	c3pfqA	transferase	1	0.62	0.27	protein kinase c beta type	crystal structure and allosteric activation of protein kinase c beta2 ii
	c4cfhA	transferase	1	0.71	0.38	5'-amp-activated protein kinase catalytic subunit alpha-1	structure of an active form of mammalian ampk
