# Supplementary material for: Identification and comparative analysis of the CIPK gene family and characterization of the cold stress response in the woody plant Prunus mume
Source: PeerJ. 2019 Apr 30;7:e6847. doi: 10.7717/peerj.6847 (PMC6499057; doi:10.7717/peerj.6847)
Supplement: Supplemental Information 11 [file peerj-07-6847-s011.xls]

## Sheet: Table S5
Supplementary Table S5 Expression profiles of PmCIPK genes in different tissues
Gene_name	bud	fruit	leaf	root	stem
PmCIPK1	26.4268	17.7511	59.739	19.7561	31.9577
PmCIPK2	67.0009	44.227	67.3235	52.3546	16.3657
PmCIPK3	20.0311	2.47053	0.745545	6.34707	6.60211
PmCIPK4	11.7383	19.1176	6.36725	48.3021	39.3297
PmCIPK5	59.0805	206.573	222.6	180.094	190.596
PmCIPK6	53.2271	49.825	110.739	21.7767	27.1371
PmCIPK7	123.925	2.83757	3.9483	0.0809815	5.59878
PmCIPK8	23.8548	27.7066	19.4623	27.1434	47.4779
PmCIPK9	450.195	1004.81	747.234	331.733	443.211
PmCIPK10	197.493	84.9314	54.8172	31.1293	108.778
PmCIPK11	181.439	147.016	42.7732	198.607	50.3275
PmCIPK12	9.82404	24.997	43.7862	31.9399	7.10059
PmCIPK13	49.2095	159.889	142.916	72.857	169.851
PmCIPK14	13.17	15.2727	12.0756	41.6937	31.0171
PmCIPK15	18.0084	22.6265	44.0223	163.042	81.4201
PmCIPK16	294.449	176.275	105.296	129.467	57.7804
