# Supplementary material for: Identification and comparative analysis of the CIPK gene family and characterization of the cold stress response in the woody plant Prunus mume
Source: PeerJ. 2019 Apr 30;7:e6847. doi: 10.7717/peerj.6847 (PMC6499057; doi:10.7717/peerj.6847)
Supplement: Supplemental Information 12 [file peerj-07-6847-s012.xls]

## Sheet: Table S6
Supplementary Table S6 Expression profiles of PmCIPK genes during the process of flower bud dormancy release
Gene_name	November	December	January	February
PmCIPK1	42.7511	48.4444	38.9574	30.2493
PmCIPK2	72.0894	95.718	53.8367	39.1998
PmCIPK3	0.833618	1.07006	0.750734	2.14929
PmCIPK4	1.03	0.945799	1.04429	4.49425
PmCIPK5	152.673	145.785	172.881	147.208
PmCIPK6	38.8597	52.5219	49.8608	34.7496
PmCIPK7	0.335694	0.261486	0.106477	1.3005
PmCIPK8	24.7272	27.6774	38.6062	45.5874
PmCIPK9	418.164	421.708	424.877	242.256
PmCIPK10	47.8036	61.8384	42.3997	51.2228
PmCIPK11	134.766	116.506	115.578	68.6336
PmCIPK12	4.55307	6.2468	9.1838	13.1631
PmCIPK13	92.8832	87.4626	93.1046	86.3111
PmCIPK14	15.3983	16.1214	19.7447	15.8526
PmCIPK15	24.872	29.6409	31.8887	39.8856
PmCIPK16	185.525	143.238	177.007	82.1473
