# Supplementary material for: Identification and comparative analysis of the CIPK gene family and characterization of the cold stress response in the woody plant Prunus mume
Source: PeerJ. 2019 Apr 30;7:e6847. doi: 10.7717/peerj.6847 (PMC6499057; doi:10.7717/peerj.6847)
Supplement: Supplemental Information 13 [file peerj-07-6847-s013.xls]

## Sheet: Table S7
Supplementary Table S7 Expression profiles of PmCIPK genes in different regions and seasons
Gene_name	Autumn (Oct.)			Winter (Jan.)			Spring (Mar.)
	BJ-2	CF-2	GZL-2	BJ-3	CF-3	GZL-3	BJ-1	CF-1	GZL-1
PmCIPK1	60.4959	34.1206	41.8966	52.2834	28.4338	48.2044	20.6262	22.5073	14.1189
PmCIPK2	259.135	237.37	181.538	220.98	205.043	252.182	30.1072	15.941	36.6082
PmCIPK3	3.65619	1.87172	2.21062	4.1243	1.65555	2.6218	1.50049	0.628186	1.00414
PmCIPK4	4.13082	4.20387	1.93042	2.72826	2.32592	2.69173	0.519704	2.4035	1.61551
PmCIPK5	117.468	112.677	147.405	201.129	168.928	177.2	113.443	94.1947	111.838
PmCIPK6	154.724	130.702	49.4775	175.923	233.34	309.247	97.4147	23.6746	46.6527
PmCIPK7	0.370687	0.458477	0.128312	0.131744	0.161858	0.575883	0.087892	0	0.165236
PmCIPK8	9.11615	12.2326	11.9071	25.7631	14.4003	18.1177	10.1912	12.3108	7.07511
PmCIPK9	313.626	441.078	510.652	622.515	458.55	511.07	468.374	157.61	318.982
PmCIPK10	479.055	345.132	400.295	192.208	194.241	483.42	58.7823	45.1872	38.9711
PmCIPK11	63.2637	54.183	48.7365	72.5527	61.5119	79.7659	18.361	11.7297	32.0743
PmCIPK12	5.8033	9.25345	3.56283	13.4097	10.8411	10.7171	3.61297	4.19241	7.4616
PmCIPK13	50.2263	52.274	48.5431	131.811	64.6939	79.6045	25.6737	34.9009	20.7691
PmCIPK14	19.5337	25.2765	28.0081	19.6002	19.6237	17.0042	24.2652	24.0515	32.6044
PmCIPK15	20.0887	11.8807	15.1646	17.2657	15.5736	26.154	32.9501	58.4722	52.7948
PmCIPK16	170.228	267.213	130.676	299.419	307.831	228.637	94.1667	27.3378	66.3033
